# Supplementary material for: Low-Coverage WGS-Based CIN Scoring Enables Cost-Effective Molecular Stratification and Prognostic Risk Assessment in Laryngeal Squamous Cell Carcinoma
Source: Research Square preprint supplement (doi:10.21203/rs.3.rs-8551894/v1), 2026-01-20
Supplement: Supplementary file 1 [file d3665a10175cee5bedd48a29.xlsx]

## Sheet: Sheet1
marker	CIN_score	CIN_score_2	chr1p	chr1q	chr2p	chr2q	chr3p	chr3q	chr4p	chr4q	chr5p	chr5q	chr6p	chr6q	chr7p	chr7q	chr8p	chr8q	chr9p	chr9q	chr10p	chr10q	chr11p	chr11q	chr12p	chr12q	chr13q	chr14q	chr15q	chr16p	chr16q	chr17p	chr17q	chr18p	chr18q	chr19p	chr19q	chr20p	chr20q	chr21p	chr21q	chr22p	chr22q
PK046-571594	110.48	98.3315	-1.80015	0.133307	-1.17752	-0.133836	-18.7211	12.9901	-3.11704	-3.46286	-2.05933	-1.4811	1.9471	-2.09651	13.1138	-9.70597	-6.16056	17.6782	-0.748724	0.078295	0.169429	-2.9094	-0.925681	-1.57074	0.849726	0.271623	3.95085	-7.39098	-0.496812	-1.13531	0.174402	-1.46603	-0.0423032	-1.75163	0.286253	-1.97889	-2.47397	2.37316	1.09094	1.0104	1.84481	NaN	-0.310164
PK046-571825	487.913	422.382	-20.9522	18.2277	18.1276	8.14157	-20.1358	15.178	-27.0323	-29.5014	-1.0203	-22.9	-22.3704	-4.45684	25.2162	28.6542	-6.84563	54.5289	1.12038	11.7015	-5.16924	-24.3942	-21.3254	-19.6322	82.8733	-1.68382	-43.0565	14.7224	-1.67029	-2.48144	-4.2566	-12.1698	9.66384	12.5698	-34.0179	2.05519	3.35652	-23.9204	3.48108	-0.870141	-18.0432	NaN	6.08167
PK046-578341	123.781	115.785	-1.82682	0.598243	-1.95167	-0.100596	-12.3678	11.6896	10.898	-13.0473	-2.64713	-0.297306	9.74786	-0.142552	3.0307	-5.49662	-11.6546	16.6171	4.09915	6.65928	-6.49281	-2.21025	-2.15326	-0.347795	0.521562	-0.552789	-3.22461	-2.07225	-1.46644	-2.04452	-0.160077	0.074175	-0.594756	0.115405	0.222918	-1.09556	-1.29051	0.991155	-0.78322	0.638561	0.947658	NaN	-1.23244
PK046-584042	597.988	492.965	-12.7819	-21.8793	43.7948	8.64805	-43.0607	44.0617	-16.6691	-23.2227	9.18738	-21.2031	12.193	-24.0379	8.4576	5.76801	-21.2534	16.9583	-10.2049	31.1013	-12.0222	-33.9276	0.444164	-19.9475	12.9329	11.3527	-43.1871	31.3399	-22.4814	8.02749	-20.2289	11.8596	25.0542	38.4942	-44.3548	-2.66912	12.7173	6.65496	-17.584	-2.35621	-16.1559	NaN	-8.01477
PK046-584826	463.51	412.763	-12.331	28.338	49.0726	-25.7194	-28.5124	85.3764	-41.4915	-40.2377	-4.87096	-27.4093	-24.2583	-44.1969	17.0948	31.6981	37.7309	61.3575	-6.92085	-7.5909	-20.4498	-7.52618	-9.09058	-28.2866	30.1685	25.9482	-25.3865	-9.81149	-14.266	5.71062	-20.108	-10.5958	0.660455	1.57185	-2.38537	-3.32146	-1.09172	1.50609	7.41174	0.552104	-16.9526	NaN	-1.28311
PK046-589447	658.644	517.221	11.465	19.217	11.2992	-5.49394	-67.1347	30.55	-80.7554	-3.49751	10.9209	-0.726162	21.5536	9.85878	5.54066	6.57812	-30.1115	75.4096	-12.5465	-14.4581	5.49342	8.70567	-62.1827	-54.4772	8.30861	4.75724	-109.551	16.3818	5.99768	5.16274	-39.8299	-36.123	15.757	34.3436	-25.3042	-28.4892	-1.52667	10.7031	2.73038	0.151919	7.11106	NaN	9.49251
PK046-592664	345.162	269.799	2.80344	-1.16937	-2.64812	-3.79895	-29.2092	12.1563	-1.20495	-7.2643	96.5028	-4.35279	-2.65244	-5.76451	-5.93451	-2.10459	-1.66659	23.2648	-1.7659	-0.273555	0.124627	1.1138	-25.4111	-2.48438	2.2958	-4.92565	-46.6796	1.34372	21.8264	-1.11127	1.91592	3.13764	-2.22306	2.43295	-19.7554	1.79319	-15.1176	0.883818	9.29104	-0.445162	-13.3533	NaN	5.5134
PK046-592871	349.621	284.066	5.47476	4.71407	-2.54249	7.35992	-31.2702	32.7532	-38.6329	2.01694	5.76572	-35.7008	7.18578	1.41807	3.63501	-5.56681	3.32008	15.4966	-27.083	3.29105	-9.10349	6.00483	-14.9372	0.446019	5.53495	4.00877	-47.4507	6.17927	6.66336	1.19463	5.6265	2.85304	8.48964	4.53333	-20.3063	-0.287621	2.61249	6.50077	7.12254	0.804232	2.99942	NaN	5.26153
PK046-593849	56.4904	50.1205	-1.97368	-1.81403	-2.09252	-1.07384	-4.24008	-1.63031	-3.49929	-3.39217	-0.409139	-4.49167	2.08874	-2.12814	-0.237529	-4.63037	21.3875	32.7138	0.104476	-0.00996892	-0.802254	-0.796815	-2.28156	-2.2195	2.15585	-2.37408	-1.35959	1.08675	2.11515	-4.11909	-2.51857	1.40293	10.0168	2.15427	-0.744989	-1.03642	-0.284842	-2.57758	-0.664468	0.490489	2.95864	NaN	1.80847
PK046-594771	417.398	349.996	1.61007	12.0302	56.4306	45.8584	-31.6735	58.773	-30.0742	-33.9007	15.0611	-11.4345	2.85311	-13.4789	-23.1912	27.7691	-19.9701	-5.26552	-5.61381	13.3707	4.68507	-35.611	-24.2373	-9.77496	-6.68258	19.104	-48.1795	-2.16712	-14.3581	2.15267	-5.01297	-1.77945	6.36764	-10.0695	-5.48334	-3.63952	-4.53292	-6.52232	-4.29695	-1.37683	-5.96147	NaN	2.69748
PK046-579706	63.2661	56.2113	-0.61306	-1.32915	-2.0948	-2.6465	-2.71156	2.36938	-2.55017	-4.00064	-0.492578	-2.46723	0.403207	-2.07349	20.5973	2.89387	0.0625134	12.1785	-2.18527	1.14403	-0.00541246	-1.7706	-0.860132	-0.198156	-1.56108	-1.64446	-3.03612	-1.14542	0.799736	-2.48679	-1.10182	1.40778	1.77875	0.754249	-1.92994	-1.03328	-0.791156	-3.20278	-0.787015	-0.0706289	1.37491	NaN	2.0735
PK046-589754	533.904	464.877	-30.0656	13.9855	21.5896	4.69586	-26.1353	51.0361	-35.1335	-4.80774	48.9503	-23.0945	-27.3951	16.075	14.6937	7.11965	-0.494592	30.123	-16.1027	11.7116	-17.9917	-37.4887	-27.2069	-16.9116	14.2303	14.1469	10.4415	-32.903	18.8226	2.12326	-19.9413	-15.6885	9.35665	5.05657	-14.4354	1.36389	2.54478	13.6509	10.5454	-3.3405	-18.6712	NaN	6.86035
PK046-569345	370.01	318.24	9.69822	11.6673	9.41597	-0.806365	-21.8022	30.8412	-25.6757	-4.49283	6.22208	-23.1426	19.3382	-24.5928	11.2615	5.60571	-23.6845	13.6967	-15.7631	7.03951	6.89059	-17.2584	-20.9036	-17.3461	32.1268	-4.78477	-38.9824	2.62874	7.40526	-1.04423	5.12828	-1.27582	3.74969	-0.215998	1.86136	-4.10213	-2.92734	11.1712	7.59388	-1.3039	-12.9203	NaN	2.75377
PK046-586063	330.929	265.866	17.8184	17.0081	-3.13434	-6.7211	-27.1575	26.5765	-33.6372	-21.1205	17.4164	-6.1513	23.1558	-5.39652	28.6866	7.56154	2.11047	27.596	-20.0756	-9.91459	8.05375	-20.0564	-7.21515	-3.95544	-2.604	-3.62997	-43.5191	17.6636	-3.54374	3.20883	5.79139	-12.2462	-1.26888	0.770815	-14.9645	-0.0481365	-9.91901	37.0537	30.0666	-0.332471	-17.9814	NaN	0.336436
PK046-586528	459.405	359.277	-39.2656	14.2202	20.4512	14.3295	-31.2765	42.8605	-40.771	-34.0416	14.1802	-37.1096	19.0209	7.11758	13.4249	11.9003	4.16336	14.077	-20.7136	11.1714	-4.65525	-6.95896	-2.29992	9.58702	12.1316	14.6835	-55.9238	7.28407	27.64	4.61397	-1.68622	-17.2551	10.9896	7.19815	-21.2925	3.62445	1.63017	8.08618	-3.74992	0.805752	-19.8674	NaN	9.28011
PK046-590254	443.281	371.912	-0.761342	22.3293	2.64324	24.3875	-16.8387	15.2748	-45.3614	-36.3145	-4.72552	-5.35246	9.39399	-16.863	33.1477	-1.94233	-8.81191	31.4349	-27.8884	-26.4839	-9.18119	-17.8379	9.60917	-16.1817	31.5978	0.326005	-40.894	-13.9323	-14.2556	3.57587	16.1387	-3.20267	-4.89581	21.1339	-13.6119	-1.52608	8.34463	-39.1614	3.32632	1.2208	-23.8617	NaN	-2.28693
PK046-593180	457.257	388.898	-10.7003	20.2553	16.6873	11.2721	-33.1781	-14.3029	-39.5063	-36.9186	56.3196	-36.3239	15.9818	10.5234	-21.2054	8.40766	-11.51	42.8319	-22.0152	27.333	6.19078	-8.92711	-20.194	17.9079	-17.107	-10.4883	-42.7	-13.5212	-1.66057	8.46722	0.66529	9.85165	11.8216	7.36019	-15.5475	-3.94797	2.24797	-4.26888	-5.57016	0.853064	-4.98643	NaN	10.4779
PK046-593184	761.358	518.325	-11.1475	55.5133	12.5982	1.35377	-41.6954	47.8863	-52.0678	-42.0006	98.6489	-40.5226	18.9245	19.8907	-59.4706	-46.909	39.6305	69.5944	7.2773	8.86099	-26.9103	-51.9478	-36.0281	6.8956	19.791	22.3064	-179.261	15.6029	-33.3781	-17.1157	-29.8568	-18.8982	19.907	8.1272	6.944	-7.91716	-12.9572	16.0103	19.207	1.48905	31.6103	NaN	-14.7913
PK046-593842	714.455	558.519	3.77385	2.18144	7.847	5.50635	-73.3253	75.5999	3.10219	2.5322	4.16942	2.42441	4.95191	3.72984	61.1239	3.13775	-63.2143	23.1141	-42.9499	-0.367398	-44.4607	4.46904	0.444315	-0.168112	3.40619	5.27894	-116.889	-1.89952	3.81077	2.28113	-3.22352	3.85653	5.14928	91.8302	-50.3513	1.95155	4.97693	0.353737	3.89806	-4.54167	6.7468	NaN	33.3366
PK046-25-211125	27.7511	24.9721	1.54987	0.439661	1.35187	-0.173749	0.171555	0.472308	2.02997	-2.39501	2.33191	-0.560739	1.3911	-0.82163	1.12474	-0.12155	0.881198	1.42466	0.665826	1.2501	-1.06716	1.18894	1.06832	2.46652	-0.0213847	0.823595	-0.280166	0.922483	0.371572	-0.730437	1.0401	0.328961	-0.0658043	0.658254	1.31617	-2.787	-1.36592	0.16039	1.88963	1.14418	0.064781	NaN	1.20476
PK046-33-211125	76.2803	63.1406	-1.67175	-0.463583	-0.312386	1.54925	-5.13628	5.43594	0.105087	2.11671	0.125871	0.0164478	-6.70956	3.15069	1.30926	0.174907	-1.26797	10.8693	-2.05976	0.333845	-2.83533	2.07503	-0.235583	0.0666531	0.56786	-0.219417	-8.40806	-1.0314	0.486814	-0.735589	0.330118	0.10027	-0.487898	2.4089	0.356331	-2.53543	-2.94016	6.67806	-3.70923	1.67363	-0.0847822	NaN	3.21347
PK046-39-211125	50.2382	43.5062	0.761686	2.43	1.19014	2.38988	1.27956	4.11487	-2.83832	-3.97788	4.34113	-1.55357	2.66063	2.95681	2.21284	0.471538	-1.72274	2.29144	1.11253	0.800753	-2.63599	3.06782	-0.339679	0.899124	1.14133	-0.327105	0.115512	-3.17536	2.3319	-4.50367	-0.864542	-0.800551	-2.34649	-2.55263	4.55863	-3.53683	-0.678955	0.484282	0.856987	-2.22121	1.10386	NaN	-1.10916
PK046-41-211125	706.28	611.766	-8.61195	-8.4653	59.1743	34.9381	-56.2688	64.5321	-73.8953	-12.2958	23.4404	-18.8074	41.71	-35.442	-10.476	6.40113	-29.529	-17.018	-36.2298	-28.2323	-7.95508	-44.6919	-24.3358	-13.5035	89.6061	-21.4704	-25.5297	-30.4551	25.9453	-7.42171	-23.9775	16.6066	35.5002	4.24676	-12.1239	-20.9332	2.02545	6.98788	10.2974	-3.77389	-38.1963	NaN	12.5832
PK046-21-211125	714.21	599.843	18.1083	13.3635	23.042	-11.6867	-37.8707	18.3123	-52.292	-6.08371	56.162	-40.6318	23.7593	20.3772	55.0173	-22.3523	7.94786	38.4168	-28.1052	-23.2203	4.91075	-42.8294	-35.6173	14.8261	17.4737	22.8355	-73.4854	17.8544	-20.7744	-22.2431	10.2517	5.8342	8.07768	42.1647	-52.4492	-9.9543	2.1627	16.147	10.1506	-1.2972	4.88739	NaN	2.25279
PK046-24-211125	40.9272	33.0126	-1.65666	-0.491843	1.40374	-1.38556	-0.855378	-0.312925	0.613582	-2.19977	-0.816652	-0.479604	-0.0738296	-1.89188	33.539	29.037	-2.00279	-0.231005	1.3761	-0.472367	-4.58878	-1.83006	-2.29509	-0.112771	-1.48382	-1.7304	-2.82671	-1.96076	-1.5578	-3.77321	-1.18237	-1.3493	-2.11903	-0.94897	2.00877	-0.832292	0.406549	-2.27038	0.165072	-1.19857	-2.68243	NaN	-1.56938
PK046-37-211125	84.1127	72.8615	-1.93064	1.41984	1.97943	0.197592	0.201293	6.08616	-7.90469	-8.03276	8.85744	-3.19053	2.41291	5.42558	5.98098	-1.38016	-1.79473	5.71684	1.31904	2.08278	-0.980693	5.83231	-1.62293	-1.29212	6.42858	-3.09159	0.736341	-6.15455	3.68784	-5.93688	-0.192914	-0.79741	-1.86505	0.969431	2.05352	-4.0679	-3.98059	-0.345494	0.726995	-3.83444	1.5525	NaN	-0.672511
PK046-38-211125	151.563	145.846	2.62664	2.13676	0.785089	4.2727	-9.79449	2.66974	3.69959	0.294042	29.0669	-11.1901	17.964	-11.7916	3.34479	1.60775	-8.93562	4.93117	-5.64829	2.23964	0.52749	-3.78883	1.33208	2.51376	3.93644	2.42912	-0.131233	2.31696	2.64618	-1.88644	0.80601	-1.86415	0.590074	6.41971	-5.79379	-2.29171	-3.79986	-3.0504	4.67002	0.92051	1.32911	NaN	0.622779
PK046-42-211125	468.794	449.641	0.013175	11.2162	1.6105	-4.96539	-38.1924	12.1385	-10.347	-32.9423	90.4256	-39.0797	39.4322	9.51944	7.81773	0.302603	-33.9021	24.7695	-12.1484	-2.59783	-7.16185	-9.48516	0.0311365	-28.3462	6.90275	-1.10524	1.15883	2.20866	7.54987	-5.65504	19.6512	12.4422	-1.1152	-17.5546	2.12904	-6.81192	-22.0766	26.1618	1.58817	1.04391	-0.906941	NaN	8.23536
PK046-1-220312	159.73	147.226	-2.30696	8.47954	-3.77929	-5.71935	-14.8301	13.6466	-8.53355	-2.99661	24.9035	-13.9321	10.8376	7.36219	-0.830654	-2.16666	-12.5823	7.1726	-6.83579	-3.65605	-1.18989	-4.20239	-3.92733	-10.1112	-2.05422	-2.94321	3.86197	-2.79561	3.85423	-5.3826	3.10038	3.8528	-1.98315	-0.884393	5.56846	-1.18423	-6.35072	4.21878	2.1425	-2.55732	-3.52799	NaN	1.99219
PK046-2-220312	592.856	548.655	-42.1228	22.2211	-7.28103	17.7346	-18.1379	43.168	-37.5605	-44.706	73.9147	-43.0854	-13.9347	-15.5413	16.4005	9.37963	-34.6028	6.09853	-15.9804	6.44658	6.24202	5.29623	-36.8294	-8.67097	4.18052	1.31636	12.7888	12.0836	10.9163	2.34647	-38.442	-9.1082	9.76407	4.02902	-27.4783	7.2722	-0.706621	-49.9735	15.5625	2.17225	15.5884	NaN	8.41193
PK046-3-220312	233.476	181.848	-7.50131	-2.12567	15.2811	-10.4566	-14.1328	28.3865	-21.5055	-19.6415	4.66957	2.76994	-7.06948	-7.77417	9.62602	3.07957	-6.2965	26.1514	3.2747	0.685707	-12.9407	2.67994	-6.59326	-16.6754	6.99378	4.99707	-16.2971	27.9203	-4.45291	-0.218654	0.180999	-0.218481	1.92035	10.263	-10.4513	-3.41904	-5.69861	3.23129	0.242413	-2.0421	-10.265	NaN	-2.95785
PK046-4-220312	221.629	207.61	-3.23149	-6.76863	8.1737	0.925596	-27.3876	22.2008	-34.8126	-10.6764	16.8719	-4.20389	7.3486	-3.86649	1.47431	3.44654	-3.98294	11.3034	3.46852	21.4515	6.79403	-2.46571	2.02372	2.96574	9.12334	-5.80596	-6.09236	5.63283	-1.01892	-10.7945	-6.97724	3.83171	4.58246	2.50749	-2.55335	-7.29917	1.30632	-11.5706	6.29522	1.11065	4.05291	NaN	1.27452
PK046-5-220312	314.393	279.056	-20.545	16.7837	5.78857	6.52396	-17.9832	16.5821	-23.5049	-23.3361	6.07381	-17.2555	-19.4808	-2.27537	22.8885	20.3242	-0.49922	26.6385	5.00718	7.40436	-6.73624	-13.5765	-2.69268	-12.4019	55.8258	0.615141	-22.1211	11.1671	-0.114216	-1.79871	-1.03026	-9.41136	2.21743	7.37469	-23.1295	3.37768	5.41035	0.705325	6.83988	0.0550741	-12.7723	NaN	1.9353
PK046-6-220312	123.876	98.9876	-2.02763	6.73759	3.22805	0.610075	-7.15777	13.1583	-14.9717	-7.99545	0.664649	-12.2319	-2.98013	1.07111	3.24366	4.18414	-3.80106	2.40557	-4.78261	1.51341	-2.08429	0.0956111	7.89311	-1.14449	5.21049	2.63749	-15.3804	6.1966	-0.990947	-4.36324	-4.89701	4.10136	5.31942	-6.28345	-3.6149	-1.45171	-0.47719	1.89493	5.99994	1.36155	-6.24364	NaN	2.32069
PK046-7-220312	372.228	325.953	-27.1769	1.77166	18.1451	-1.10444	-26.3863	70.4103	-35.8521	-32.8745	33.4145	-25.7733	-13.4106	-19.7979	11.3259	8.4206	-11.3352	5.9223	-11.2484	17.0458	19.625	-1.85146	-13.4016	-21.657	4.71003	-3.14236	-0.260982	-23.6732	11.6049	-3.29178	-3.38227	6.27022	11.3844	0.803498	-2.89363	-0.65521	-9.26032	7.9468	5.52885	-1.17274	-16.2174	NaN	10.7363
PK046-8-220312	195.426	176.344	-3.70387	8.56101	1.3704	4.22121	-13.2485	1.48841	-9.14327	-21.97	15.9868	-16.4045	1.77197	-11.5955	0.337676	15.0811	-3.81309	8.13463	-16.0855	-5.32827	-1.31405	2.72498	-8.90245	-0.363802	1.48196	3.59505	-9.93439	-0.765829	8.32642	-1.48093	-2.98819	2.26854	2.95368	1.09455	-9.66377	-5.12912	3.26087	-5.37825	11.2402	1.95257	-4.24555	NaN	-0.0545638
PK046-9-220312	211.038	164.547	-0.009458	-0.94945	0.499575	2.53422	-15.4672	7.87741	-25.1097	-6.08615	11.2913	-6.56197	0.109593	3.39686	-3.95524	8.95846	-1.26828	2.09208	-8.252	15.5315	-9.94612	8.79936	-20.1692	3.01509	0.216647	0.692928	-29.605	-14.6635	0.648549	3.66662	9.9794	0.914459	0.439649	-0.204978	2.33122	-1.19883	1.94609	13.9811	10.5611	0.904752	-1.95143	NaN	-1.57409
PK046-10-220312	423.846	316.145	-11.3622	-11.5436	10.6956	-7.29237	-18.5904	9.87124	-39.048	-9.28775	38.6268	-18.2328	10.7452	-10.1266	0.999041	10.2374	-18.7971	4.34289	-8.66945	7.39371	-6.06537	-3.84825	-4.74911	-7.60619	15.803	12.0618	-21.4639	54.4197	-11.9176	-6.81853	-8.83762	-9.56431	27.7735	5.82558	-13.1231	-3.36551	-14.2015	-7.66094	24.4177	-1.50331	-15.8844	NaN	19.9001
PK046-001	184.314	177.551	-1.80015	0.133307	-1.17752	-0.133836	-43.0607	44.0617	10.898	-13.0473	-2.64713	-0.297306	9.74786	-0.142552	3.0307	-5.49662	-11.6546	16.6171	4.09915	6.65928	-6.49281	-2.21025	-2.15326	-0.347795	0.521562	-0.552789	-3.22461	-2.07225	-1.46644	-2.04452	-0.160077	0.074175	-0.594756	0.115405	0.222918	-1.09556	-1.29051	0.991155	-0.78322	0.638561	0.947658	NaN
PK046-002	571.796	474.788	-20.9522	18.2277	18.1276	8.14157	-31.2702	32.7532	-16.6691	-23.2227	9.18738	-21.2031	12.193	-24.0379	8.4576	5.76801	-21.2534	16.9583	-10.2049	31.1013	-12.0222	-33.9276	0.444164	-19.9475	12.9329	11.3527	-43.1871	31.3399	-22.4814	8.02749	-20.2289	11.8596	25.0542	38.4942	-44.3548	-2.66912	12.7173	6.65496	-17.584	-2.35621	-16.1559	NaN
PK046-003	371.182	306.119	5.47476	4.71407	19.1276	9.14157	-67.1347	30.55	-27.0323	-29.5014	17.4164	-6.1513	23.1558	-5.39652	28.6866	7.56154	2.11047	27.596	-20.0756	-9.91459	8.05375	-20.0564	-7.21515	-3.95544	-2.604	-3.62997	-43.5191	17.6636	-3.54374	3.20883	5.79139	-12.2462	-1.26888	0.770815	-14.9645	-0.0481365	-9.91901	37.0537	30.0666	-0.332471	-17.9814	NaN	0.336436
PK046-004	325.09	224.962	-1.80015	0.133307	-1.17752	-0.133836	1.27956	4.11487	-3.11704	-3.46286	14.1802	-37.1096	19.0209	7.11758	13.4249	11.9003	4.16336	14.077	-20.7136	11.1714	-4.65525	-6.95896	-2.29992	9.58702	12.1316	14.6835	-55.9238	7.28407	27.64	4.61397	-1.68622	-17.2551	10.9896	7.19815	-21.2925	3.62445	1.63017	8.08618	-3.74992	0.805752	-19.8674	NaN	9.28011
PK046-005	88.5727	76.4239	-1.65666	-0.491843	-1.17752	-0.133836	-5.13628	5.43594	-3.11704	-3.46286	-2.05933	-1.4811	1.9471	-2.09651	13.1138	-9.70597	-6.16056	17.6782	-0.748724	0.078295	0.169429	-2.9094	-0.925681	-1.57074	0.849726	0.271623	3.95085	-7.39098	-0.496812	-1.13531	0.174402	-1.46603	-0.0423032	-1.75163	0.286253	-1.97889	-2.47397	2.37316	1.09094	1.0104	1.84481	NaN	-0.310164
PK046-006	101.277	89.1278	-1.93064	1.41984	-1.17752	-0.133836	-18.7211	2.36938	-3.11704	-3.46286	-2.05933	-1.4811	1.9471	-2.09651	13.1138	-9.70597	-6.16056	17.6782	-0.748724	0.078295	0.169429	-2.9094	-0.925681	-1.57074	0.849726	0.271623	3.95085	-7.39098	-0.496812	-1.13531	0.174402	-1.46603	-0.0423032	-1.75163	0.286253	-1.97889	-2.47397	2.37316	1.09094	1.0104	1.84481	NaN	-0.310164
PK046-007	714.21	599.843	18.1083	13.3635	23.042	-11.6867	-37.8707	18.3123	-52.292	-6.08371	56.162	-40.6318	23.7593	20.3772	55.0173	-22.3523	7.94786	38.4168	-28.1052	-23.2203	4.91075	-42.8294	-35.6173	14.8261	17.4737	22.8355	-73.4854	17.8544	-20.7744	-22.2431	10.2517	5.8342	8.07768	42.1647	-52.4492	-9.9543	2.1627	16.147	10.1506	-1.2972	4.88739	NaN	2.25279
PK046-008	64.1714	56.2567	-1.65666	-0.491843	1.40374	-1.38556	-0.855378	-0.312925	0.613582	-2.19977	-0.816652	-0.479604	-0.0738296	-1.89188	1.12474	-0.12155	-11.6546	16.6171	1.3761	-0.472367	-4.58878	-1.83006	-2.29509	-0.112771	-1.48382	-1.7304	-2.82671	-1.96076	-1.5578	-3.77321	-1.18237	-1.3493	-2.11903	-0.94897	2.00877	-0.832292	0.406549	-2.27038	0.165072	-1.19857	-2.68243	NaN	-1.56938
PK046-009	32.8625	28.5632	1.54987	0.439661	1.35187	-0.173749	0.171555	0.472308	2.02997	-2.39501	-0.816652	-0.479604	-0.0738296	-1.89188	33.539	29.037	-2.00279	-0.231005	2.33191	-0.560739	1.3911	-0.82163	1.12474	-0.12155	0.881198	1.42466	0.665826	1.2501	-1.06716	1.18894	1.06832	2.46652	-0.0213847	0.823595	-0.280166	0.922483	0.371572	-0.730437	1.0401	0.328961	-0.0658043	NaN	1.31617
PK046-010	520.399	507.913	0.013175	11.2162	1.6105	-4.96539	-38.1924	70.4103	-10.347	-32.9423	90.4256	-39.0797	39.4322	9.51944	7.81773	0.302603	-33.9021	24.7695	-12.1484	-2.59783	-7.16185	-9.48516	0.0311365	-28.3462	6.90275	-1.10524	1.15883	2.20866	7.54987	-5.65504	19.6512	12.4422	-1.1152	-17.5546	2.12904	-6.81192	-22.0766	26.1618	1.58817	1.04391	-0.906941	NaN

## Sheet: Sheet2
实验室编号	样本标签	性别	年龄	样本类型	染色体异常	微生物感染	病理类型	分化	肿瘤原发部位	部位	location	T stage	T stage	N stage	N	肿瘤大小	肿瘤大小	肿瘤大小	生存状态	分子分型-更新	分子分型	复发	PFS	CIN_score	maxZ	count|Z|	chr1p	chr1q	chr2p	chr2q	chr3p	chr3q	chr4p	chr4q	chr5p	chr5q	chr6p	chr6q	chr7p	chr7q	chr8p	chr8q	chr9p	chr9q	chr10p	chr10q	chr11p	chr11q	chr12p
PK046-25-211125	任英海	男	56	组织	neg		高分化鳞状细胞癌	1	声门型	2	0	T3	3	N0	0	3.5	3.5	1	0	Low CIN	0	0	11.7699	27.7511	2.787	0	1.54987	0.439661	1.35187	-0.173749	0.171555	0.472308	2.02997	-2.39501	2.33191	-0.560739	1.3911	-0.82163	1.12474	-0.12155	0.881198	1.42466	0.665826	1.2501	-1.06716	1.18894	1.06832	2.46652	-0.0213847
PK046-009	牛建坤	男	64	组织	3q+,2+，7q+, 9p-	/	(喉肿物)鳞状细胞癌（中分化），肿瘤大小约2.5*2.3*1cm,左侧颈部淋巴结（0/16）及与右侧颈部淋巴结（0/9）均未见癌转移。	2	声门上型	1	0	T3	3	N0	0	2.5	2.5	0	0	Low CIN	0	0	17.2932	32.8625	33.539	2	1.54987	0.439661	1.35187	-0.173749	0.171555	0.472308	2.02997	-2.39501	-0.816652	-0.479604	-0.0738296	-1.89188	33.539	29.037	-2.00279	-0.231005	2.33191	-0.560739	1.3911	-0.82163	1.12474	-0.12155	0.881198
PK046-24-211125	靳云海	男	57	组织	7+16-17-		高-中分化鳞状细胞癌。	2	声门型	2	0	T4	4	N0	0	4.0	4	1	0	Low CIN	0	0	12	40.9272	33.539	5	-1.65666	-0.491843	1.40374	-1.38556	-0.855378	-0.312925	0.613582	-2.19977	-0.816652	-0.479604	-0.0738296	-1.89188	33.539	29.037	-2.00279	-0.231005	1.3761	-0.472367	-4.58878	-1.83006	-2.29509	-0.112771	-1.48382
PK046-39-211125	罗完旦	男	79	组织	10p-16-		中分化鳞状细胞癌	2	声门上型	1	0	T1	1	N0	0	2.0	2	0	0	Low CIN	0	0	7.39726	50.2382	4.55863	9	0.761686	2.43	1.19014	2.38988	1.27956	4.11487	-2.83832	-3.97788	4.34113	-1.55357	2.66063	2.95681	2.21284	0.471538	-1.72274	2.29144	1.11253	0.800753	-2.63599	3.06782	-0.339679	0.899124	1.14133
PK046-593849	赵金斗	男	66	蜡卷	8+10-11-16-17q+18-		(喉)鳞状细胞癌）	1	声门型	2	0	T3	3	N0	0	2.0	2	0	0	Low CIN	0	0	18.2795	56.4904	32.7138	10	-1.97368	-1.81403	-2.09252	-1.07384	-4.24008	-1.63031	-3.49929	-3.39217	-0.409139	-4.49167	2.08874	-2.12814	-0.237529	-4.63037	21.3875	32.7138	0.104476	-0.00996892	-0.802254	-0.796815	-2.28156	-2.2195	2.15585
PK046-579706	赵连西	男	67	蜡卷	1q+,3q+,7+,8q+,12p+,18q-,19q+		中分化鳞状细胞癌	2	声门型	2	0	T3	3	N0	0	2.0	2	0	0	Low CIN	0	0	25.7425	63.2661	20.5973	5	-0.61306	-1.32915	-2.0948	-2.6465	-2.71156	2.36938	-2.55017	-4.00064	-0.492578	-2.46723	0.403207	-2.07349	20.5973	2.89387	0.0625134	12.1785	-2.18527	1.14403	-0.00541246	-1.7706	-0.860132	-0.198156	-1.56108
PK046-008	赵拴计	男	61	组织	8q+	Treponema denticola	（喉）鳞状细胞癌（高-中分化），肿瘤大小约3cm*2.5cm*2cm,未见肯定脉管内癌栓。（左侧颈部）淋巴结（0/14）及（右侧颈部）淋巴结（0/7）均未见癌转移。	2	声门型	2	0	T3	3	N0	0	3.0	3	0	0	Low CIN	0	0	36.3945	64.1714	16.6171	5	-1.65666	-0.491843	1.40374	-1.38556	-0.855378	-0.312925	0.613582	-2.19977	-0.816652	-0.479604	-0.0738296	-1.89188	1.12474	-0.12155	-11.6546	16.6171	1.3761	-0.472367	-4.58878	-1.83006	-2.29509	-0.112771	-1.48382
PK046-33-211125	魏建民	男	65	组织	3p-13-20p+20p-		高-中分化鳞状细胞癌。	2	声门型	2	0	T4	4	N0	0	3.3	3.3	1	0	Low CIN	0	0	9.46849	76.2803	10.8693	9	-1.67175	-0.463583	-0.312386	1.54925	-5.13628	5.43594	0.105087	2.11671	0.125871	0.0164478	-6.70956	3.15069	1.30926	0.174907	-1.26797	10.8693	-2.05976	0.333845	-2.83533	2.07503	-0.235583	0.0666531	0.56786
PK046-37-211125	吕树明	男	56	组织	3-5p-14-		高分化鳞状细胞癌	1	声门上型	1	0	T1	1	N0	0	1.6	1.6	0	0	Low CIN	0	0	8.48219	84.1127	8.85744	18	-1.93064	1.41984	1.97943	0.197592	0.201293	6.08616	-7.90469	-8.03276	8.85744	-3.19053	2.41291	5.42558	5.98098	-1.38016	-1.79473	5.71684	1.31904	2.08278	-0.980693	5.83231	-1.62293	-1.29212	6.42858
PK046-005	杨文杰	男	66	组织	所有染色体	Parvimonas micra	（喉肿物）乳头状鳞状细胞癌，肿瘤大小约3*2*1.5cm,未见肯定脉管内癌栓，（右侧颈部）淋巴结 未见癌转移（0/9）。	1	声门型	2	0	T3	3	N0	0	3.0	3	0	0	Low CIN	0	0	38.4658	88.5727	17.6782	10	-1.65666	-0.491843	-1.17752	-0.133836	-5.13628	5.43594	-3.11704	-3.46286	-2.05933	-1.4811	1.9471	-2.09651	13.1138	-9.70597	-6.16056	17.6782	-0.748724	0.078295	0.169429	-2.9094	-0.925681	-1.57074	0.849726
PK046-006	冯庆寅	男	76	组织	所有染色体	/	（右侧声带及声门肿物）鳞状细胞癌	1	声门型	2	0	T2	2	N0	0	1.5	1.5	0	0	Low CIN	0	0	38.7945	101.277	18.7211	9	-1.93064	1.41984	-1.17752	-0.133836	-18.7211	2.36938	-3.11704	-3.46286	-2.05933	-1.4811	1.9471	-2.09651	13.1138	-9.70597	-6.16056	17.6782	-0.748724	0.078295	0.169429	-2.9094	-0.925681	-1.57074	0.849726
PK046-578341	解书全	男	46	蜡卷	3p-,3q+，4p+4q-8p-8q+9+		中分化鳞状细胞癌	2	声门型	2	0	T3	3	N0	0	3.0	3	0	0	Low CIN	0	0	26.4329	123.781	16.6171	13	-1.82682	0.598243	-1.95167	-0.100596	-12.3678	11.6896	10.898	-13.0473	-2.64713	-0.297306	9.74786	-0.142552	3.0307	-5.49662	-11.6546	16.6171	4.09915	6.65928	-6.49281	-2.21025	-2.15326	-0.347795	0.521562
PK046-6-220312	510796张路雪	男	62	组织	3p-3q+4-5-13-16-18-21-		中分化鳞状细胞癌	2	喉咽	4	1	T3	3	N0	0	2.5	2.5	0	1	High CIN	1	1	26.6959	123.876	15.3804	23	-2.02763	6.73759	3.22805	0.610075	-7.15777	13.1583	-14.9717	-7.99545	0.664649	-12.2319	-2.98013	1.07111	3.24366	4.18414	-3.80106	2.40557	-4.78261	1.51341	-2.08429	0.0956111	7.89311	-1.14449	5.21049
PK046-38-211125	李绪贵	男	62	组织	3p-4q-5p+6p-6q+8p-13p-		高分化鳞状细胞癌	1	跨声门型	3	1	T4	4	N0	0	3.0	3	0	0	High CIN	1	0	7.33151	151.563	29.0669	18	2.62664	2.13676	0.785089	4.2727	-9.79449	2.66974	3.69959	0.294042	29.0669	-11.1901	17.964	-11.7916	3.34479	1.60775	-8.93562	4.93117	-5.64829	2.23964	0.52749	-3.78883	1.33208	2.51376	3.93644
PK046-1-220312	536954王福瑞	男	65	组织	1q+2q-3p-3q+5p+5q-6+8p-8q+9p-11-15+16p-17q-18+21-		中分化鳞状细胞癌	2	喉咽	4	1	T4	4	N0	0	5.0	5	1	1	High CIN	1	1	21.5342	159.73	24.9035	26	-2.30696	8.47954	-3.77929	-5.71935	-14.8301	13.6466	-8.53355	-2.99661	24.9035	-13.9321	10.8376	7.36219	-0.830654	-2.16666	-12.5823	7.1726	-6.83579	-3.65605	-1.18989	-4.20239	-3.92733	-10.1112	-2.05422
PK046-001	郭富	男	58	组织	所有染色体	/	（喉）基底样鳞状细胞癌，肿瘤大小约3.2cm*1.8cm*1.2cm,可见脉管内癌栓，送检（左侧）淋巴结（1/5）可见癌转移，（右侧）淋巴结（0/6）未见癌转移。	3	声门上型	1	0	T2	2	N1	1	3.2	3.2	1	0	High CIN	1	1	16.6027	184.314	#REF!	13	-1.80015	0.133307	-1.17752	-0.133836	-43.0607	44.0617	10.898	-13.0473	-2.64713	-0.297306	9.74786	-0.142552	3.0307	-5.49662	-11.6546	16.6171	4.09915	6.65928	-6.49281	-2.21025	-2.15326	-0.347795	0.521562
PK046-8-220312	516279张立合	男	47	组织	所有染色体		中分化鳞状细胞癌	2	跨声门型	3	1	T3	3	N1	1	5.5	5.5	1	1	High CIN	1	1	13.1178	195.426	21.97	23	-3.70387	8.56101	1.3704	4.22121	-13.2485	1.48841	-9.14327	-21.97	15.9868	-16.4045	1.77197	-11.5955	0.337676	15.0811	-3.81309	8.13463	-16.0855	-5.32827	-1.31405	2.72498	-8.90245	-0.363802	1.48196
PK046-9-220312	504448李金占	男	63	组织	3p-3q+4-7p+7q-9p-9q+10p-10q+11p-13-14-16+20+		中低分化鳞状细胞癌	3	声门型	2	0	T3	3	N0	0	2.0	2	0	0	High CIN	1	0	59.4082	211.038	29.605	21	-0.009458	-0.94945	0.499575	2.53422	-15.4672	7.87741	-25.1097	-6.08615	11.2913	-6.56197	0.109593	3.39686	-3.95524	8.95846	-1.26828	2.09208	-8.252	15.5315	-9.94612	8.79936	-20.1692	3.01509	0.216647
PK046-4-220312	504660袁济琛	男	67	组织	3p-3q+4p-5p+6q-8p-8q+9+12p+12q-14+16-20p-20q+		中分化鳞状细胞癌	2	跨声门型	3	1	T3	3	N0	0	3.5	3.5	1	1	High CIN	1	1	21.0411	221.629	34.8126	28	-3.23149	-6.76863	8.1737	0.925596	-27.3876	22.2008	-34.8126	-10.6764	16.8719	-4.20389	7.3486	-3.86649	1.47431	3.44654	-3.98294	11.3034	3.46852	21.4515	6.79403	-2.46571	2.02372	2.96574	9.12334
PK046-3-220312	550754刘方方	男	67	组织	1p-3p-3q+7p+7q-8q+10p-13-14+21-22-		低分化鳞状细胞癌	3	跨声门型	3	1	T4	4	N0	0	4.5	4.5	1	0	High CIN	1	0	38.2027	233.476	28.3865	28	-7.50131	-2.12567	15.2811	-10.4566	-14.1328	28.3865	-21.5055	-19.6415	4.66957	2.76994	-7.06948	-7.77417	9.62602	3.07957	-6.2965	26.1514	3.2747	0.685707	-12.9407	2.67994	-6.59326	-16.6754	6.99378
PK046-5-220312	571825郝连忠	男	57	组织	1p-1q+3p-3q+4-5p+5q-6p-7+8q+9p+10-11-12p+13-14+17p-18p+18q-21-		中低分化鳞状细胞癌	3	跨声门型	3	1	T4	4	N2b	1	6.0	6	1	0	High CIN	1	0	30.3452	314.393	55.8258	28	-20.545	16.7837	5.78857	6.52396	-17.9832	16.5821	-23.5049	-23.3361	6.07381	-17.2555	-19.4808	-2.27537	22.8885	20.3242	-0.49922	26.6385	5.00718	7.40436	-6.73624	-13.5765	-2.69268	-12.4019	55.8258
PK046-004	金玉森	男	63	组织	3+，5+，7+，8+，10-，20+，22+	/	（喉）鳞状细胞癌（高分化），右侧颈部淋巴结（1/9）可见癌转移，（左颈部)淋巴结（0/10）未见癌转移。	1	声门型	2	0	T4	4	N1	1	5.0	5	1	1	High CIN	1	1	31.7918	325.09	55.9238	32	-1.80015	0.133307	-1.17752	-0.133836	1.27956	4.11487	-3.11704	-3.46286	14.1802	-37.1096	19.0209	7.11758	13.4249	11.9003	4.16336	14.077	-20.7136	11.1714	-4.65525	-6.95896	-2.29992	9.58702	12.1316
PK046-586063	宋铁良	男	49	蜡卷	所有染色体		高-中分化鳞状细胞癌。	2	喉咽	4	1	T2	2	N0	0	3.0	3	0	0	High CIN	1	0	22.5534	330.929	43.5191	32	17.8184	17.0081	-3.13434	-6.7211	-27.1575	26.5765	-33.6372	-21.1205	17.4164	-6.1513	23.1558	-5.39652	28.6866	7.56154	2.11047	27.596	-20.0756	-9.91459	8.05375	-20.0564	-7.21515	-3.95544	-2.604
PK046-592664	王学文	男	68	蜡卷	3p-,3q+，5p+5q-6q-8q+11p-13-15+18q-		高分化鳞状细胞癌	1	声门型	2	0	T3	3	N0	0	2.0	2	0	0	High CIN	1	0	19.1342	345.162	96.5028	19	2.80344	-1.16937	-2.64812	-3.79895	-29.2092	12.1563	-1.20495	-7.2643	96.5028	-4.35279	-2.65244	-5.76451	-5.93451	-2.10459	-1.66659	23.2648	-1.7659	-0.273555	0.124627	1.1138	-25.4111	-2.48438	2.2958
PK046-592871	冯清营	男	65	蜡卷	所有染色体		高-中分化鳞状细胞癌。	2	喉咽	4	1	T4	4	N1	1	5.0	5	1	0	High CIN	1	1	10.7178	349.621	47.4507	28	5.47476	4.71407	-2.54249	7.35992	-31.2702	32.7532	-38.6329	2.01694	5.76572	-35.7008	7.18578	1.41807	3.63501	-5.56681	3.32008	15.4966	-27.083	3.29105	-9.10349	6.00483	-14.9372	0.446019	5.53495
PK046-569345	代双廷	男	68	蜡卷	所有染色体		中分化鳞状细胞癌	2	声门型	2	0	T2	2	N0	0	1.5	1.5	0	0	High CIN	1	0	31.2658	370.01	38.9824	29	9.69822	11.6673	9.41597	-0.806365	-21.8022	30.8412	-25.6757	-4.49283	6.22208	-23.1426	19.3382	-24.5928	11.2615	5.60571	-23.6845	13.6967	-15.7631	7.03951	6.89059	-17.2584	-20.9036	-17.3461	32.1268
PK046-003	刘双成	男	55	组织	所有染色体	/	鳞状细胞癌（高-中分化）可见脉管内癌栓，送检淋巴结（2/9）可见癌转移。	2	喉咽	4	1	T4	4	N2b	1	3.5	3.5	1	0	High CIN	1	0	38.6959	371.182	67.1347	32	5.47476	4.71407	19.1276	9.14157	-67.1347	30.55	-27.0323	-29.5014	17.4164	-6.1513	23.1558	-5.39652	28.6866	7.56154	2.11047	27.596	-20.0756	-9.91459	8.05375	-20.0564	-7.21515	-3.95544	-2.604
PK046-7-220312	568028李社良	男	64	组织	所有染色体		中分化鳞状细胞癌	2	跨声门型	3	1	T3	3	N0	0	4.0	4	1	0	High CIN	1	1	21.9288	372.228	70.4103	31	-27.1769	1.77166	18.1451	-1.10444	-26.3863	70.4103	-35.8521	-32.8745	33.4145	-25.7733	-13.4106	-19.7979	11.3259	8.4206	-11.3352	5.9223	-11.2484	17.0458	19.625	-1.85146	-13.4016	-21.657	4.71003
PK046-594771	乔建军	男	72	蜡卷	所有染色体		(喉)鳞状细胞癌（中分化）	2	声门型	2	0	T3	3	N1	1	2.0	2	0	0	High CIN	1	1	15.5056	417.398	58.773	32	1.61007	12.0302	56.4306	45.8584	-31.6735	58.773	-30.0742	-33.9007	15.0611	-11.4345	2.85311	-13.4789	-23.1912	27.7691	-19.9701	-5.26552	-5.61381	13.3707	4.68507	-35.611	-24.2373	-9.77496	-6.68258
PK046-10-220312	505511王香元	男	68	组织	所有染色体		低分化鳞状细胞癌	3	跨声门型	3	1	T3	3	N0	0	3.0	3	0	0	High CIN	1	0	54.2795	423.846	54.4197	37	-11.3622	-11.5436	10.6956	-7.29237	-18.5904	9.87124	-39.048	-9.28775	38.6268	-18.2328	10.7452	-10.1266	0.999041	10.2374	-18.7971	4.34289	-8.66945	7.39371	-6.06537	-3.84825	-4.74911	-7.60619	15.803
PK046-590254	张新庆	男	72	蜡卷	所有染色体		中-低分化鳞状细胞癌。	3	声门上型	1	0	T3	3	N0	0	4.5	4.5	1	1	High CIN	1	1	13.5123	443.281	45.3614	33	-0.761342	22.3293	2.64324	24.3875	-16.8387	15.2748	-45.3614	-36.3145	-4.72552	-5.35246	9.39399	-16.863	33.1477	-1.94233	-8.81191	31.4349	-27.8884	-26.4839	-9.18119	-17.8379	9.60917	-16.1817	31.5978
PK046-593180	郑俊楼	男	62	蜡卷	1q+,3q+,5p+,6+,7q+,8q+,9q+,10q-,11q+,17+,18q-		高-中分化鳞状细胞癌。	2	声门上型	1	0	T3	3	N0	0	2.0	2	0	0	High CIN	1	0	18.9041	457.257	56.3196	36	-10.7003	20.2553	16.6873	11.2721	-33.1781	-14.3029	-39.5063	-36.9186	56.3196	-36.3239	15.9818	10.5234	-21.2054	8.40766	-11.51	42.8319	-22.0152	27.333	6.19078	-8.92711	-20.194	17.9079	-17.107
PK046-586528	张国栋	男	65	蜡卷	所有染色体		高-中分化鳞状细胞癌。	2	声门型	2	0	T3	3	N0	0	4.5	4.5	1	0	High CIN	1	0	22.3562	459.405	55.9238	36	-39.2656	14.2202	20.4512	14.3295	-31.2765	42.8605	-40.771	-34.0416	14.1802	-37.1096	19.0209	7.11758	13.4249	11.9003	4.16336	14.077	-20.7136	11.1714	-4.65525	-6.95896	-2.29992	9.58702	12.1316
PK046-584826	史建柱	男	60	蜡卷	所有染色体		中分化鳞状细胞癌	2	声门上型	1	0	T4	4	N0	0	3.5	3.5	1	0	High CIN	1	0	23.3096	463.51	85.3764	32	-12.331	28.338	49.0726	-25.7194	-28.5124	85.3764	-41.4915	-40.2377	-4.87096	-27.4093	-24.2583	-44.1969	17.0948	31.6981	37.7309	61.3575	-6.92085	-7.5909	-20.4498	-7.52618	-9.09058	-28.2866	30.1685
PK046-42-211125	郜仁通	男	64	组织	所有染色体		中分化鳞状细胞癌	2	喉咽	4	1	T1	1	N0	0	1.5	1.5	0	0	High CIN	1	0	36.3945	468.794	90.4256	27	0.013175	11.2162	1.6105	-4.96539	-38.1924	12.1385	-10.347	-32.9423	90.4256	-39.0797	39.4322	9.51944	7.81773	0.302603	-33.9021	24.7695	-12.1484	-2.59783	-7.16185	-9.48516	0.0311365	-28.3462	6.90275
PK046-571825	郝连忠	男	57	蜡卷	所有染色体		中-低分化鳞状细胞癌。	3	跨声门型	3	1	T4	4	N2b	1	6.0	6	1	1	High CIN	1	1	17.326	487.913	82.8733	31	-20.9522	18.2277	18.1276	8.14157	-20.1358	15.178	-27.0323	-29.5014	-1.0203	-22.9	-22.3704	-4.45684	25.2162	28.6542	-6.84563	54.5289	1.12038	11.7015	-5.16924	-24.3942	-21.3254	-19.6322	82.8733
PK046-010	边根锡	男	62	组织	所有染色体	Filifactor alocis	(喉)鳞状细胞癌（中分化），肿瘤大小约5*3*0.8cm,“左颈部”淋巴结可见癌转移（2/23）.	2	喉咽	4	1	T3	3	N2b	1	5.0	5	1	0	High CIN	1	0	17.2274	520.399	#REF!	26	0.013175	11.2162	1.6105	-4.96539	-38.1924	70.4103	-10.347	-32.9423	90.4256	-39.0797	39.4322	9.51944	7.81773	0.302603	-33.9021	24.7695	-12.1484	-2.59783	-7.16185	-9.48516	0.0311365	-28.3462	6.90275
PK046-589754	庞彦海	男	62	蜡卷	3q+,7p+,7q-,8q+		中分化鳞状细胞癌	2	声门上型	1	0	T3	3	N0	0	2.0	2	0	0	High CIN	1	0	25.2822	533.904	51.0361	34	-30.0656	13.9855	21.5896	4.69586	-26.1353	51.0361	-35.1335	-4.80774	48.9503	-23.0945	-27.3951	16.075	14.6937	7.11965	-0.494592	30.123	-16.1027	11.7116	-17.9917	-37.4887	-27.2069	-16.9116	14.2303
PK046-002	王希连	男	82	组织	所有染色体	Treponema denticola	中-低分化鳞状细胞癌。肿瘤大小约2*2*1cm,未做颈淋巴结清扫。	3	喉咽	4	1	T2	2	N0	0	2.0	2	0	1	High CIN	1	1	15.5507	571.796	#REF!	35	-20.9522	18.2277	18.1276	8.14157	-31.2702	32.7532	-16.6691	-23.2227	9.18738	-21.2031	12.193	-24.0379	8.4576	5.76801	-21.2534	16.9583	-10.2049	31.1013	-12.0222	-33.9276	0.444164	-19.9475	12.9329
PK046-2-220312	526026南成来	男	50	组织	1p-1q+2+3p-4-5p-5q+6-8p-9p-11-13p+15+16q-18-20+		中分化鳞状细胞癌	2	跨声门型	3	1	T3	3	N0	0	2.5	2.5	0	1	High CIN	1	1	23.3425	592.856	73.9147	34	-42.1228	22.2211	-7.28103	17.7346	-18.1379	43.168	-37.5605	-44.706	73.9147	-43.0854	-13.9347	-15.5413	16.4005	9.37963	-34.6028	6.09853	-15.9804	6.44658	6.24202	5.29623	-36.8294	-8.67097	4.18052
PK046-584042	贾金铎	男	67	蜡卷	所有染色体		低分化鳞状细胞癌	3	声门型	2	0	T4	4	N2	1	4.0	4	1	0	High CIN	1	0	23.737	597.988	44.3548	36	-12.7819	-21.8793	43.7948	8.64805	-43.0607	44.0617	-16.6691	-23.2227	9.18738	-21.2031	12.193	-24.0379	8.4576	5.76801	-21.2534	16.9583	-10.2049	31.1013	-12.0222	-33.9276	0.444164	-19.9475	12.9329
PK046-589447	王彦果	男	63	蜡卷	所有染色体		中-低分化鳞状细胞癌。	3	声门上型	1	0	T4	4	N2b	1	3.5	3.5	1	0	High CIN	1	0	20.9096	658.644	109.551	35	11.465	19.217	11.2992	-5.49394	-67.1347	30.55	-80.7554	-3.49751	10.9209	-0.726162	21.5536	9.85878	5.54066	6.57812	-30.1115	75.4096	-12.5465	-14.4581	5.49342	8.70567	-62.1827	-54.4772	8.30861
PK046-41-211125	李步中	男	66	组织	所有染色体		中分化鳞状细胞癌	2	声门上型	1	0	T3	3	N0	0	3.0	3	0	0	High CIN	1	0	7.10137	706.28	89.6061	38	-8.61195	-8.4653	59.1743	34.9381	-56.2688	64.5321	-73.8953	-12.2958	23.4404	-18.8074	41.71	-35.442	-10.476	6.40113	-29.529	-17.018	-36.2298	-28.2323	-7.95508	-44.6919	-24.3358	-13.5035	89.6061
PK046-21-211125	刘连雪	男	70	组织	所有染色体		中分化鳞状细胞癌	2	喉咽	4	1	T2	2	N0	0	2.5	2.5	0	0	High CIN	1	1	10.6192	714.21	73.4854	36	18.1083	13.3635	23.042	-11.6867	-37.8707	18.3123	-52.292	-6.08371	56.162	-40.6318	23.7593	20.3772	55.0173	-22.3523	7.94786	38.4168	-28.1052	-23.2203	4.91075	-42.8294	-35.6173	14.8261	17.4737
PK046-007	魏树强	男	60	组织	所有染色体	/	（喉肿物）鳞状细胞癌（中-低分化），肿瘤大小4.5*4*2.5cm,（右侧）淋巴结（4/17）可见癌转移，（左侧）淋巴结（0/6）未见癌转移。	3	喉咽	4	1	T3	3	N2b	1	4.0	4	1	0	High CIN	1	1	3.3863	714.21	73.4854	36	18.1083	13.3635	23.042	-11.6867	-37.8707	18.3123	-52.292	-6.08371	56.162	-40.6318	23.7593	20.3772	55.0173	-22.3523	7.94786	38.4168	-28.1052	-23.2203	4.91075	-42.8294	-35.6173	14.8261	17.4737
PK046-007	魏树强	男	60	蜡卷	所有染色体		非角化型鳞状细胞癌	3	跨声门型	3	1	T3	3	N2b	1	4.0	4	1	0	High CIN	1	1	3.3863	714.21	73.4854	36	18.1083	13.3635	23.042	-11.6867	-37.8707	18.3123	-52.292	-6.08371	56.162	-40.6318	23.7593	20.3772	55.0173	-22.3523	7.94786	38.4168	-28.1052	-23.2203	4.91075	-42.8294	-35.6173	14.8261	17.4737
PK046-593842	张守明	男	75	蜡卷	2p+,3p-,3q+,4q-,5p+,6q-,7+,8p-,8q+,9q+,11p+,12+,14+,16q-,17q+,18q-		高-中分化鳞状细胞癌。	2	声门型	2	0	T3	3	N0	0	2.5	2.5	0	0	High CIN	1	0	18.6082	714.455	116.889	28	3.77385	2.18144	7.847	5.50635	-73.3253	75.5999	3.10219	2.5322	4.16942	2.42441	4.95191	3.72984	61.1239	3.13775	-63.2143	23.1141	-42.9499	-0.367398	-44.4607	4.46904	0.444315	-0.168112	3.40619
PK046-593184	赵小银	男	67	蜡卷	3q+,4q-,8q+		中分化鳞状细胞癌	2	声门上型	1	0	T2	2	N0	0	2.5	2.5	0	0	High CIN	1	0	18.9041	761.358	179.261	37	-11.1475	55.5133	12.5982	1.35377	-41.6954	47.8863	-52.0678	-42.0006	98.6489	-40.5226	18.9245	19.8907	-59.4706	-46.909	39.6305	69.5944	7.2773	8.86099	-26.9103	-51.9478	-36.0281	6.8956	19.791
[truncated: 18 more columns]
